# Supplementary material for: SAMMate: a GUI tool for processing short read alignments in SAM/BAM format
Source: Springer Nature journal article supplement (doi:10.1186/1751-0473-6-2), 2011-01-13
Supplement: Additional file 1 [file 1751-0473-6-2-s1.pdf]

# SAMMate

## SAMMate

Computational Biology Research Group  
Department of Computer Science  
University of New Orleans

January 2011

## [MANUAL]

SAMMate allows biomedical researchers to quickly process SAM/BAM files. This software is constantly updated and will greatly facilitate the downstream analysis of NGS data in the SAM/BAM format. Both the source code and the GUI executable are freely available at <http://SAMMate.sourceforge.net>.

# SAMMate Manual

Copyright © 2009-2011 Computational Biology Group@UNO Computer Science. All rights reserved.

## Abstract

Welcome to the *SAMMate* Manual. Here you will find information on how to install and configure the application. It is a step-by-step, task-oriented guide for configuring *SAMMate* on your system.

## License

This document is maintained by the Computational Biology Group at UNO Computer Science and is freely available under the GNU General Public License.

*SAMMate* is free software; you can redistribute it and/or modify it under the terms of version 2 of the GNU General Public License as published by the Free Software Foundation.

*SAMMate* is distributed in the hope that it will be useful, but WITHOUT ANY WARRANTY; without even the implied warranty of MERCHANTABILITY or FITNESS FOR A PARTICULAR PURPOSE. See the GNU General Public License for more details.

A copy of version 2 of the GNU General Public License is appended in the installation package. For more information, see <<http://www.gnu.org/licenses/>>.

# Table of Contents

|                                                                        |    |
|------------------------------------------------------------------------|----|
| Chapter 1 Introduction.....                                            | 4  |
| Chapter 2 Installation .....                                           | 5  |
| 2.1. Preparing to Install .....                                        | 6  |
| 2.1.1. System Requirements .....                                       | 6  |
| 2.1.2. Running Environment .....                                       | 6  |
| 2.2 Installing SAMMate .....                                           | 7  |
| Chapter 3 Usages.....                                                  | 8  |
| 3.1. File Management.....                                              | 9  |
| 3.1.1. Working Directory.....                                          | 9  |
| 3.1.2. Work Space .....                                                | 10 |
| 3.2. SAM/BAM Format Conversion .....                                   | 11 |
| 3.2.1. Format Conversion .....                                         | 11 |
| 3.3. SAM/BAM File Sorting .....                                        | 12 |
| 3.3.1 Sorting a SAM/BAM File.....                                      | 12 |
| 3.4. Gene Expression Abundance Score Calculation .....                 | 13 |
| 3.4.1 Processing a Genome Annotation File and RNA-seq Data Files ..... | 13 |
| 3.5. File Format Customization .....                                   | 15 |
| 3.5.1 Customizing a genome annotation file .....                       | 15 |
| 3.5.2 Customizing the signal map intervals.....                        | 15 |
| 3.5.3 Customizing the chromosome names .....                           | 16 |
| 3.6. Memory Configuration on MAC OS.....                               | 17 |
| 3.6.1 Allocating more memory on the MAC OS.....                        | 17 |
| Chapter 4 Case Studies .....                                           | 18 |
| 4.1. Calculating Genomic Feature Abundance Scores .....                | 19 |
| 4.1.1 Example .....                                                    | 19 |
| 4.2. Generating a Signal Map for Peak Detection .....                  | 21 |
| 4.2.1 Example .....                                                    | 21 |
| 4.3. Generating Wiggle File for Visualization .....                    | 23 |
| 4.3.1 Example .....                                                    | 23 |
| 4.4. Generating Alignment Report .....                                 | 25 |
| 4.4.1 Example.....                                                     | 25 |

# Chapter 1 Introduction

Welcome to the *SAMMate* Manual.

Here you can find information on how to install and configure SAMMate. It is a step-by-step, task-oriented guide for configuring *SAMMate* on your system.

This manual assumes you have a basic understanding of your operating system. Some installation details are covered in Chapter 2: Installation. If you need detailed instructions on using *SAMMate*, please refer to Chapter 3: Usages and Chapters 4: Use Case Studies.

An HTML version of the manual is available online at SAMMate's homepage:

<http://SAMMate.sourceforge.net/>

# Chapter 2 Installation

This chapter provides a quick overview on installing *SAMMate*.

## **2.1. Preparing to Install**

This section explains SAMMate's requirements.

### 2.1.1. System Requirements

Recommended Memory: 2GB RAM

Minimum Memory: 1GB RAM

OS: Windows 7, Vista, Mac OS 9, Mac OS X

Note: SAMMate for WinXP can be downloaded from [here](#)

### 2.1.2. Running Environment

A recent version of the Java Runtime Environment (JRE) is needed prior to using SAMMate.

For Windows this involves a quick download from the following Oracle site:

<http://www.java.com/en/download/manual.jsp>

Java is standard on Mac OS X. For Mac OS 9, you may need to get the Mac OS Runtime for Java (MRJ) from the following Apple site:

<http://docs.info.apple.com/article.html?artnum=75097>

## **2.2 Installing SAMMate**

- Download the zip file *SAMMate2.4.zip* that matches your OS to your local hard drive.
- Decompress it, and open the software folder *SAMMate 2.4*.
- Double click the executable file *SAMMate.exe* (Windows) or *SAMMate.app* (Mac).

## Chapter 3 Usages

This chapter provides a detailed guide of using *SAMMate*. Some typical usage scenarios are listed below:

- [Working directory management.](#)
- [Adding annotation files and data files to the workspace.](#)
- [Removing annotation files and data files from the workspace.](#)
- [Converting from SAM format to BAM format and vice-versa.](#)
- [Sorting SAM/BAM files.](#)
- [Enabling/disabling the building of the coverage file and the signal map file.](#)
- [Customization of Genome Annotation File](#)
- [Customization of Signal Map Intervals](#)
- [Customization of Chromosome Names](#)

## **3.1. File Management**

You can change the working directory and add/remove the annotation file or data files to/from the *Work Space* in SAMMate.

### 3.1.1. Working Directory

Users can change the working directory for managing the annotation file and data files or for outputting the resulting files.

#### **To display the directory dialogue**

- Select File > Open from the menu, or click the  toolbar button.

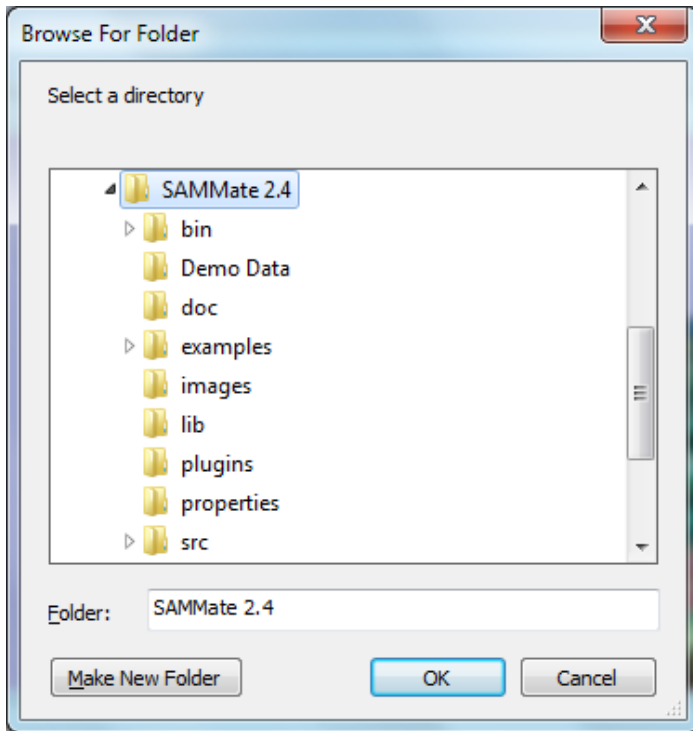

Figure 3.1.1-1 Open directory dialogue

- From the directory tree, select the desired folder, and press the OK button.
- The directory and the files under the selected folder are displayed in the *File Browser Window*.

### 3.1.2. Work Space

*Work Space* allows users to add/remove the annotation file and data files.

#### To add files to the Work Space

- In the *File Browser Window*, right click on the desired annotation or data file, and then left click *Add to Work Space*. Alternatively, double left click on the desired file in the *File Browser Window*. Either method will add the selected file to the *Work Space*.

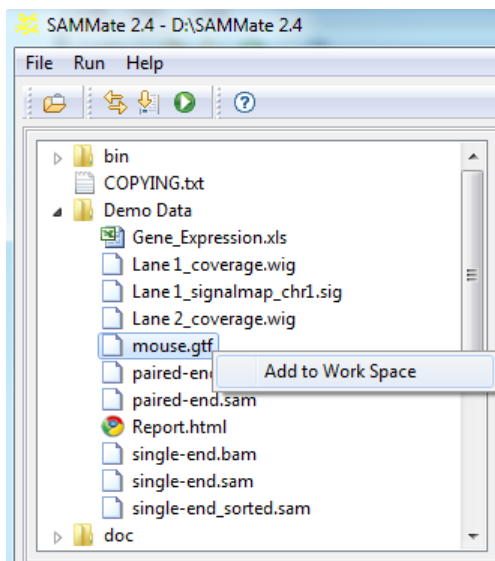

Figure 3.1.2-1 File Browser window

#### To remove files from the Work Space

- In the *Work Space*, right click on the desired annotation or data file, and then left click *Delete Selection*. Alternatively, double left click on the desired file to remove it from the *Work Space*.

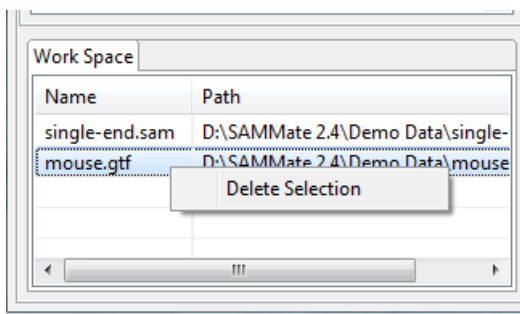

Figure 3.1.2-2 Work Space







- Press the OK button to process the selected genome annotation file and RNA-seq data files in the table.

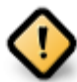

The selected files *must* include only one genome annotation file and at least one SAM/BAM file. The BED file is optional.

## 3.5. File Format Customization

### 3.5.1 Customizing a genome annotation file

*SAMMate* also calculates the abundance scores for customized genomic intervals by customizing a genome annotation file.

- Go to the *SAMMate 2.4 > example > Annotation Files* folder and open one genome annotation file as the reference.
- Follow the format in the selected annotation file to customize a genome annotation file by adding the gene name, chromosome name, exon count, exon start position and end position, etc.
- Add the customized genome annotation file and RNA-seq data files into the Work Space to calculate the gene expression abundance score, coverage depth, signal map and so on.

| #geneName    | name         | chrom | strand | txStart | txEnd  | cdsStart | cdsEnd | exonCount | exonStarts            | exonEnds              |
|--------------|--------------|-------|--------|---------|--------|----------|--------|-----------|-----------------------|-----------------------|
| FAM138F      | NR_026820    | chr1  | -      | 34611   | 36081  | 36081    | 36081  | 3         | 34611,35276,35720,    | 35174,35481,36081,    |
| FAM138A      | NR_026818    | chr1  | -      | 34611   | 36081  | 36081    | 36081  | 3         | 34611,35276,35720,    | 35174,35481,36081,    |
| FAM138C      | NR_026822    | chr1  | -      | 34611   | 36081  | 36081    | 36081  | 3         | 34611,35276,35720,    | 35174,35481,36081,    |
| OR4F5        | NM_001005484 | chr1  | +      | 69090   | 70008  | 69090    | 70008  | 1         | 69090,                | 70008,                |
| LOC100132287 | NR_028322    | chr1  | +      | 323891  | 328580 | 328580   | 328580 | 3         | 323891,324287,324438, | 324060,324345,328580, |
| LOC100132062 | NR_028325    | chr1  | +      | 323891  | 328580 | 328580   | 328580 | 3         | 323891,324287,324438, | 324060,324345,328580, |
| OR4F29       | NM_001005221 | chr1  | +      | 367658  | 368595 | 367658   | 368595 | 1         | 367658,               | 368595,               |
| OR4F3        | NM_001005224 | chr1  | +      | 367658  | 368595 | 367658   | 368595 | 1         | 367658,               | 368595,               |
| OR4F16       | NM_001005277 | chr1  | +      | 367658  | 368595 | 367658   | 368595 | 1         | 367658,               | 368595,               |
| OR4F29       | NM_001005221 | chr1  | -      | 621097  | 622034 | 621097   | 622034 | 1         | 621097,               | 622034,               |
| OR4F3        | NM_001005224 | chr1  | -      | 621097  | 622034 | 621097   | 622034 | 1         | 621097,               | 622034,               |
| OR4F16       | NM_001005277 | chr1  | -      | 621097  | 622034 | 621097   | 622034 | 1         | 621097,               | 622034,               |

Figure 3.5.1-1 Customizing genome annotation file

### 3.5.2 Customizing the signal map intervals

*SAMMate* allows user to customize the signal map intervals to generate the base-wise signal map information that fall between the customized the intervals for peak detection.

- Go to the *SAMMate 2.4 > properties* folder and open *signalMap.txt*.
- Follow the format in the example file to customize the signal map intervals by adding the chromosome name, start position and end position. See Figure 3.5.2-1.
- Select File > Run > Run from the menu, or click the  toolbar button.
- Set the *User Properties to enable build signal map file*.
- Press the OK button to build the signal map file.

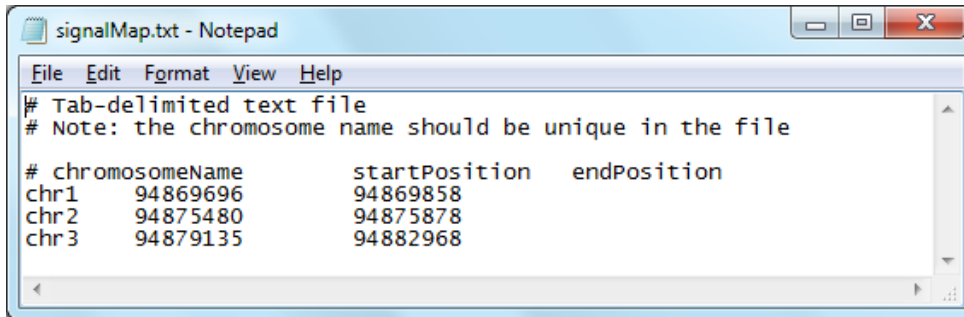

Figure 3.5.2-1 Signal map configuration file

### 3.5.3 Customizing the chromosome names

Between the genome annotation file and the RNA-seq data file, the chromosome names are often mismatched due to different databases and/or aligners. To remedy this situation, *SAMMate* allows user to customize the relationship map between different chromosome names allowing the system to automatically map the customized chromosome names during calculations.

- Go to the *SAMMate 2.4 > properties* folder and open *chromosomesMap.txt*.
- Define the mapping relationship of chromosome names between different versions. For example, by adding add the line:

**gi|89161185|ref|NC\_000001.9|NC\_000001      chr1**

*SAMMate* will automatically replace the string “gi|89161185|ref|NC\_000001.9|NC\_000001” with “chr1” in the output files.

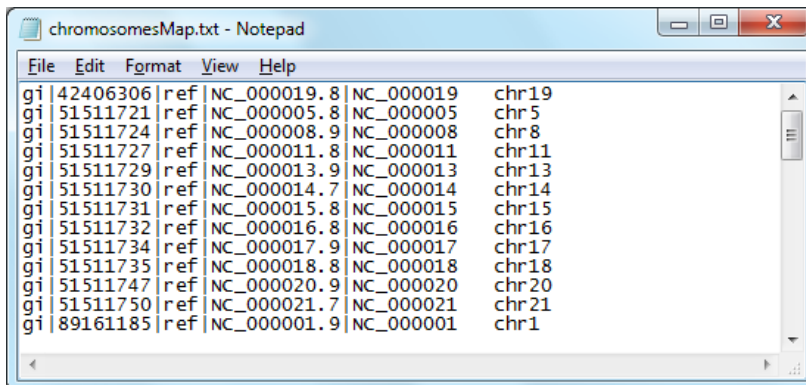

Figure 3.5.3-1 Chromosomes map configuration file

## 3.6. Memory Configuration on MAC OS

### 3.6.1 Allocating more memory on the MAC OS

*SAMMate* also allows users to increase the amount of memory allocated to improve its performance on the Mac OS platform. Users can easily increase the amount of memory to use by modifying the launching file (*SAMMate.app*).

- Go to the *SAMMate 2.4* folder, and right click on the launching file *SAMMate.app*.
- Select “*Show Package Contents*”.
- Go to the folder *Contents*.
- Open the file “*Info.plist*” by double clicking on it.
- In the line Java -> VMOptions, change the parameter from “-Xmx1024M” to “-Xmx2048M”.
- Save the changes, and launch *SAMMate.app* again.

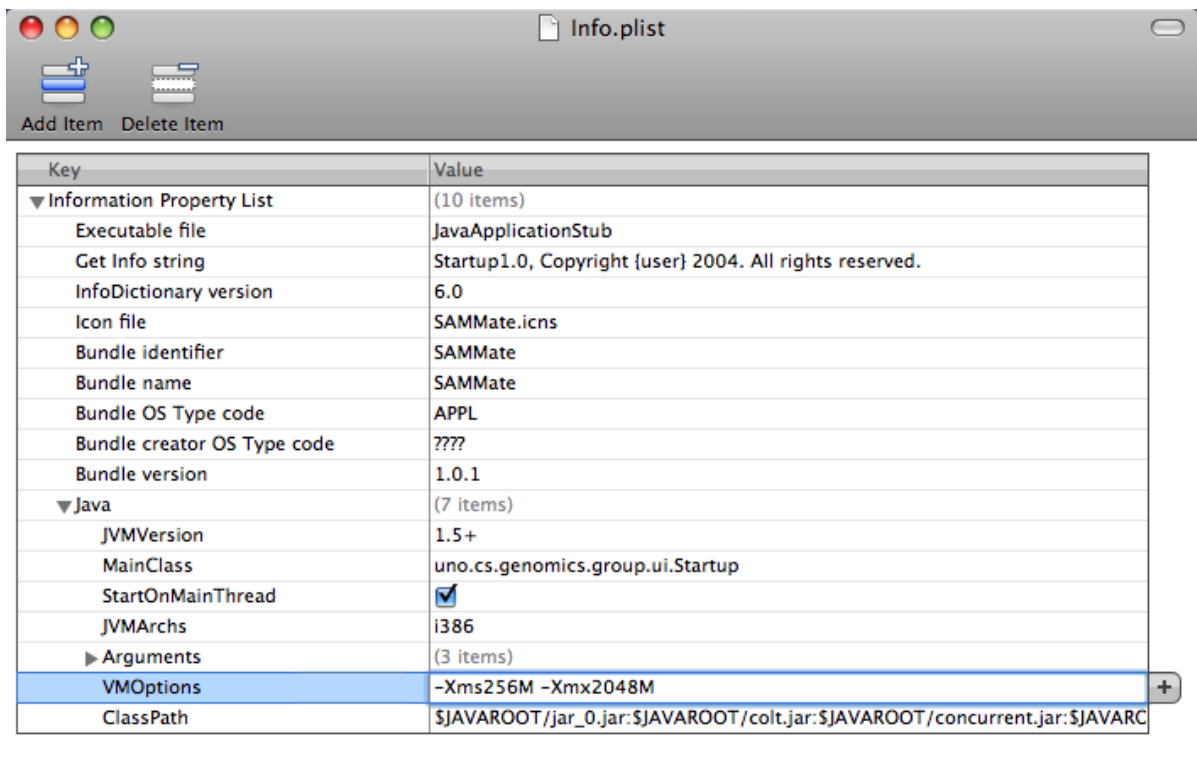

Figure 3.6.1-1 Info.plist file

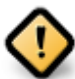

On a 32-bit machine, the allocated memory cannot exceed 2048MB (or 2GB).

## Chapter 4 Case Studies

This chapter provides some detailed examples for user case studies:

- [Calculating genomic feature abundance scores](#)
- [Generating a signal map for peak detection](#)
- [Generating coverage wiggle files for visualization](#)
- [Generating an alignment report](#)

The genome annotation file and simulation RNA-seq data files used in these examples can be downloaded from

<http://SAMMate.sourceforge.net/download.html>

## 4.1. Calculating Genomic Feature Abundance Scores

*SAMMate* combines both short reads mapped to exons (e.g. available in SAM/BAM format) and to exon-exon junctions (e.g. available in BED format) to accurately estimate gene expression scores. *SAMMate* can also process many pairs of SAM (BAM)/BED files simultaneously.

*SAMMate* allows users to calculate the genomic feature abundance scores for any user-defined genomic intervals. This utility dramatically simplifies the technical barriers for discovering novel genes.

### 4.1.1 Example

Download the genome annotation file and the simulation RNA-seq data to a local hard drive from <http://SAMMate.sourceforge.net/download.html>. Unzip to a temporary folder, and perform the following:

- Change the working directory to the temporary folder.
- Select File > Run > Run from the menu, or click the  toolbar button.
- In the popup dialogue, press the *Add* button to add the genome annotation file, SAM/BAM files or BED files into the table.
- In the popup dialogue, set the *User Properties* to enable/disable building a coverage file and/or a signal map file.

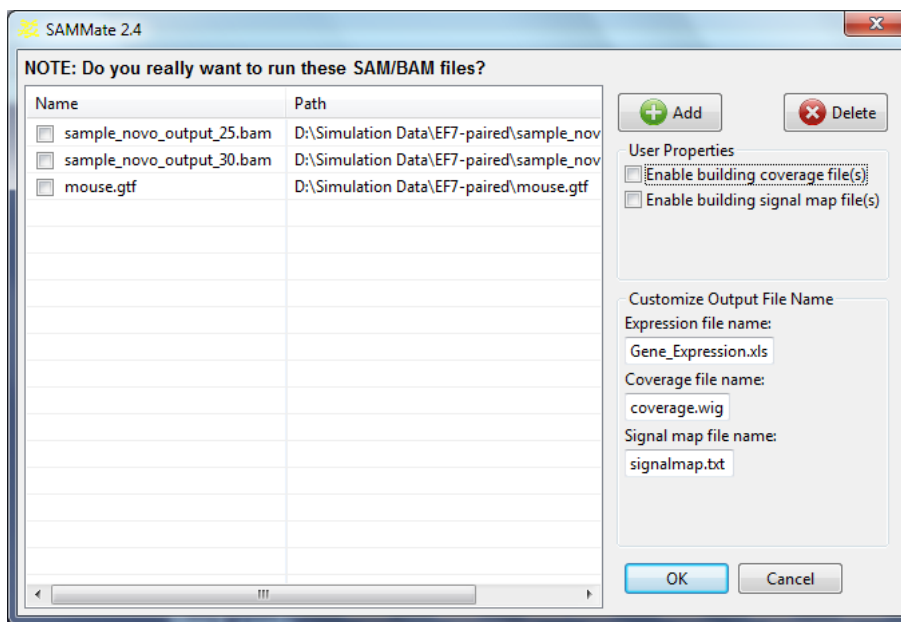

Figure 4.1.1-1 Annotation file and RNA-seq data processing dialogue

- In the popup dialogue, you can customize the output file names.
- Press the OK button to process the selected files.
- After the process is finished, the annotation file and the genomic feature abundance scores are displayed in the *Navigator window*. A Microsoft EXCEL compatible gene expression matrix is also generated in the temporary folder.

| Chromosome | Gene Name     | Length of Exons | Reads Counts... | RPKM (sample_novo... |
|------------|---------------|-----------------|-----------------|----------------------|
| chr10      | 1110012D08Rik | 2335            | 2338            | 54.18771349346376    |
| chr10      | 1110021L09Rik | 2837            | 4               | 0.07630339462506351  |
| chr10      | 1110038D17Rik | 2910            | 0               | 0.0                  |
| chr10      | 1190007I07Rik | 559             | 3055            | 295.7621609276553    |
| chr10      | 1500009L16Rik | 1193            | 1               | 0.045363103636065626 |
| chr10      | 1600002K03Rik | 651             | 4               | 0.3325233956241247   |
| chr10      | 1700009J07Rik | 914             | 0               | 0.0                  |
| chr10      | 1700017N19Rik | 1690            | 1647            | 52.74121112692302    |
| chr10      | 1700020N01Rik | 1061            | 471             | 24.024188522541174   |
| chr10      | 1700021F05Rik | 898             | 395             | 23.804768532228714   |
| chr10      | 1700025K23Rik | 730             | 269             | 19.94217962955517    |
| chr10      | 1700027D21Rik | 1331            | 7273            | 295.71866440639417   |
| chr10      | 1700040L02Rik | 1238            | 0               | 0.0                  |
| chr10      | 1700049L16Rik | 806             | 528             | 35.452109718079754   |
| chr10      | 1700052N19Rik | 2290            | 0               | 0.0                  |

Figure 4.1.1-2 Navigator window

## 4.2. Generating a Signal Map for Peak Detection

A signal map is also another frequently demanded data format for NGS data analysis. In a signal map file, alignment results are represented in the per-base “pileup” format. In this format the single nucleotide short read coverage depth is calculated whereas the whole genome coverage is provided as a vector of integers with length  $3.2 \times 10^9$ .

*SAMMate* allows users to generate a signal map for a number of frequently performed sequential analyses to detect a wide range of genomic features based on user-defined genomic intervals.

### 4.2.1 Example

Download the genome annotation file and the simulation RNA-seq data to a local hard drive from <http://SAMMate.sourceforge.net/download.html>. Unzip to a temporary folder, and perform the following:

- Change the working directory to the temporary folder.
- Go to the *SAMMate 2.4 > properties* folder, and open *signalMap.txt*.
- Follow the format in the example file to customize the signal map intervals by adding the chromosome name, start position and end position. Save the file upon completion.

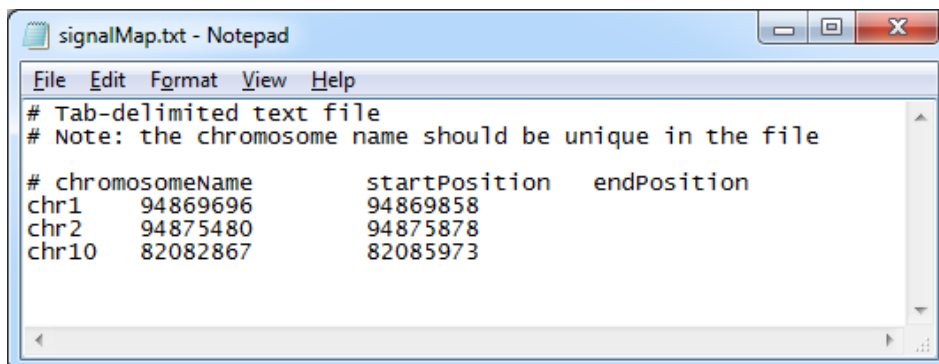

```

# Tab-delimited text file
# Note: the chromosome name should be unique in the file

# chromosomeName      startPosition  endPosition
chr1      94869696      94869858
chr2      94875480      94875878
chr10     82082867      82085973

```

Figure 4.2.1-1 Signal map configuration file

- Select File > Run > Run from the menu, or click the  toolbar button.
- In the popup dialogue, press the *Add* button to add the genome annotation file, SAM/BAM files or BED files into the table.
- In the popup dialogue, set the *User Properties* to *enable build signal map file*.

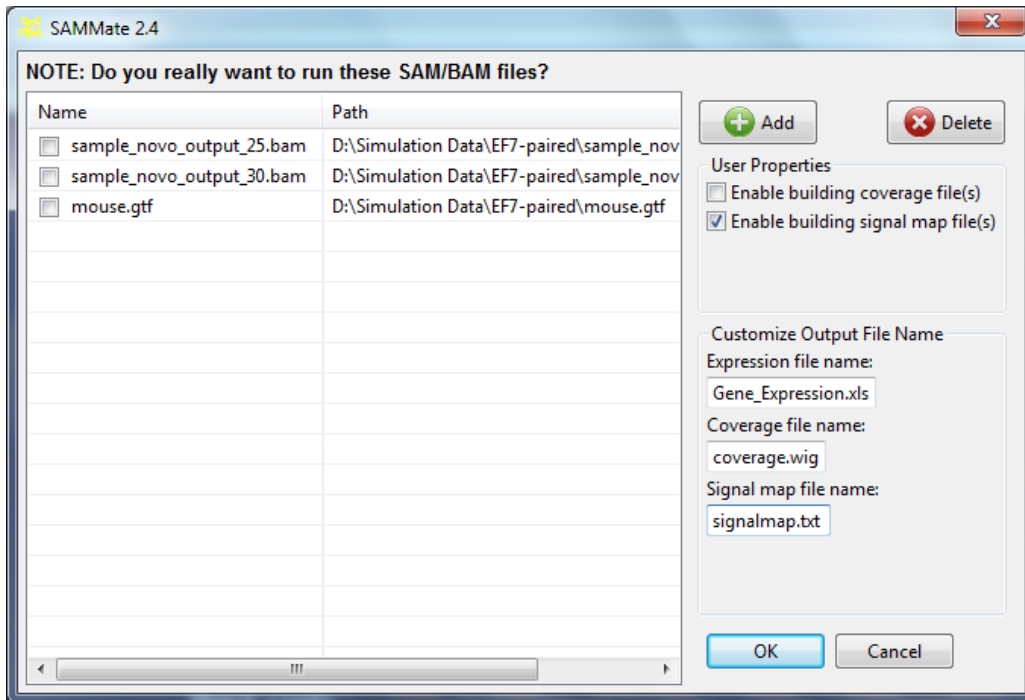

Figure 4.2.1-2 Annotation file and RNA-seq data processing dialogue

- In the popup dialogue, you can customize the output file names.
- Press the OK button to process the selected files.
- After the process is finished, the signal map file ordered by chromosome names is generated in the temporary folder.

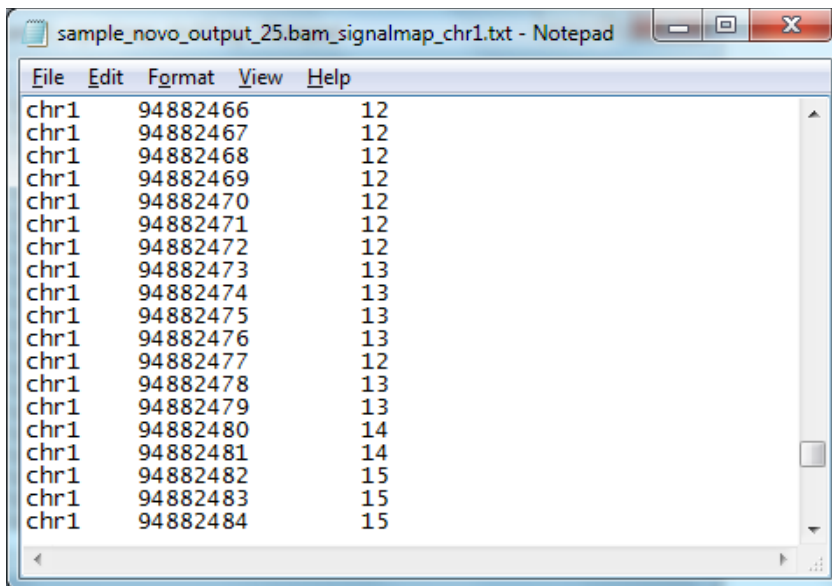

Figure 4.2.1-3 Signal map resulting file

## 4.3. Generating Wiggle File for Visualization

The wiggle (WIG) format is to display dense, continuous data such as GC percent, probability scores, and transcriptome data. A key *SAMMate* feature is to generate wiggle files for biomedical researchers so that they may visually search for gene structure alterations. These output files are compatible with the UCSC genome browser and other browsers used for visualization. This feature will allow biomedical researchers to visually check the alignment quality of selected genes in the selected genome regions.

### 4.3.1 Example

Download the genome annotation file and the simulation RNA-seq data to a local hard drive from <http://SAMMate.sourceforge.net/download.html>. Unzip to a temporary folder, and perform the following:

- Change the working directory to the temporary folder.
- Select File > Run > Run from the menu, or click the  toolbar button.
- In the popup dialogue, press the *Add* button to add the genome annotation file, SAM/BAM files or BED files into the table.
- In the popup dialogue, set the *User Properties* to *enable build coverage file*.

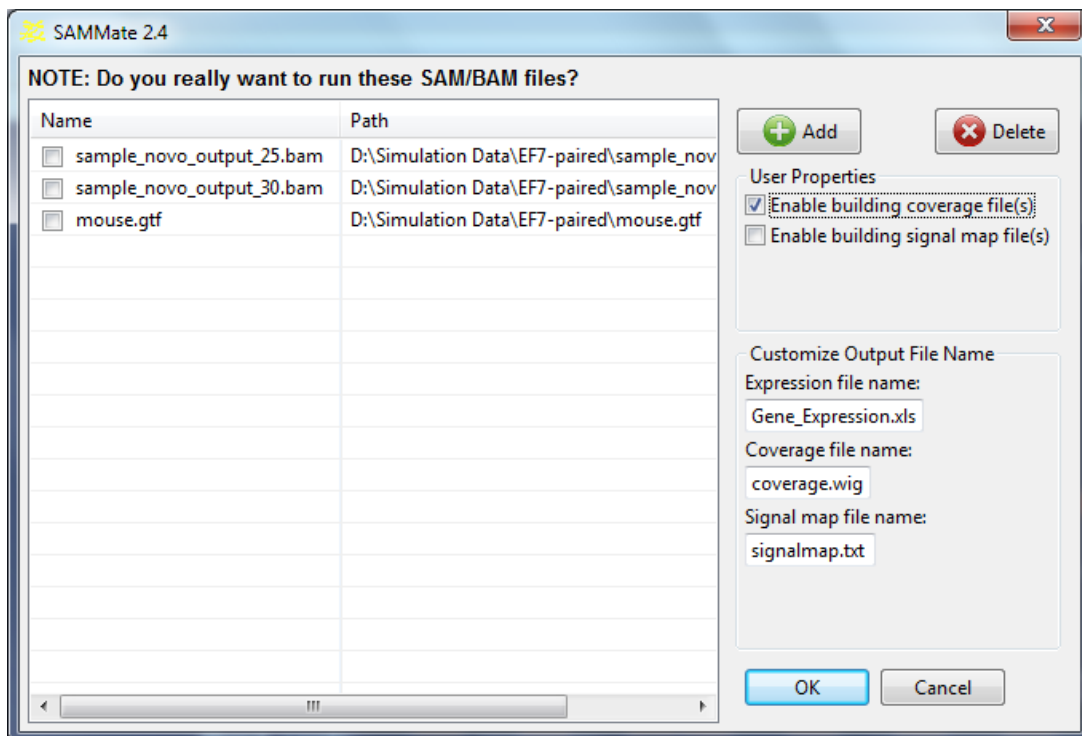

Figure 4.3.1-1 Annotation file and RNA-seq data processing dialogue

- In the popup dialogue, you can customize the output file names.
- Press the OK button to process the selected files.
- After the process is finished, the coverage file sorted by chromosomal position is generated in the temporary folder.

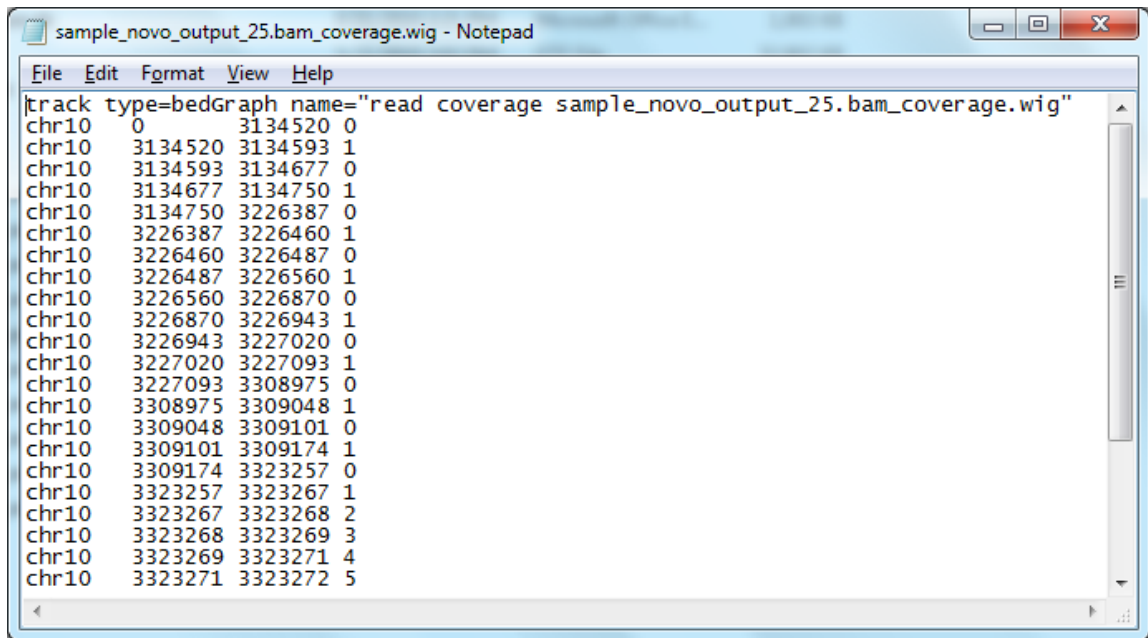

Figure 4.3.1-2 Coverage wiggle resulting file

## 4.4. Generating Alignment Report

Short read alignment statistics provide indispensable resources to examine the alignment quality as well as to compare the alignment results. *SAMMate* calculates and exports a number of alignment statistics including the percentage of uniquely mapped short reads as well as the percentage of short reads mapped to intergenic, exonic and intronic regions.

### 4.4.1 Example

Download the genome annotation file and the simulation RNA-seq data to a local hard drive from <http://SAMMate.sourceforge.net/download.html>. Unzip to a temporary folder, and perform the following:

- Change the working directory to the temporary folder.
- Select File > Run > Run from the menu, or click the  toolbar button.
- In the popup dialogue, press *Add* button to add the genome annotation file, SAM/BAM files or BED files into the table.
- In the popup dialogue, set the *User Properties* to disable build coverage file and signal map file.

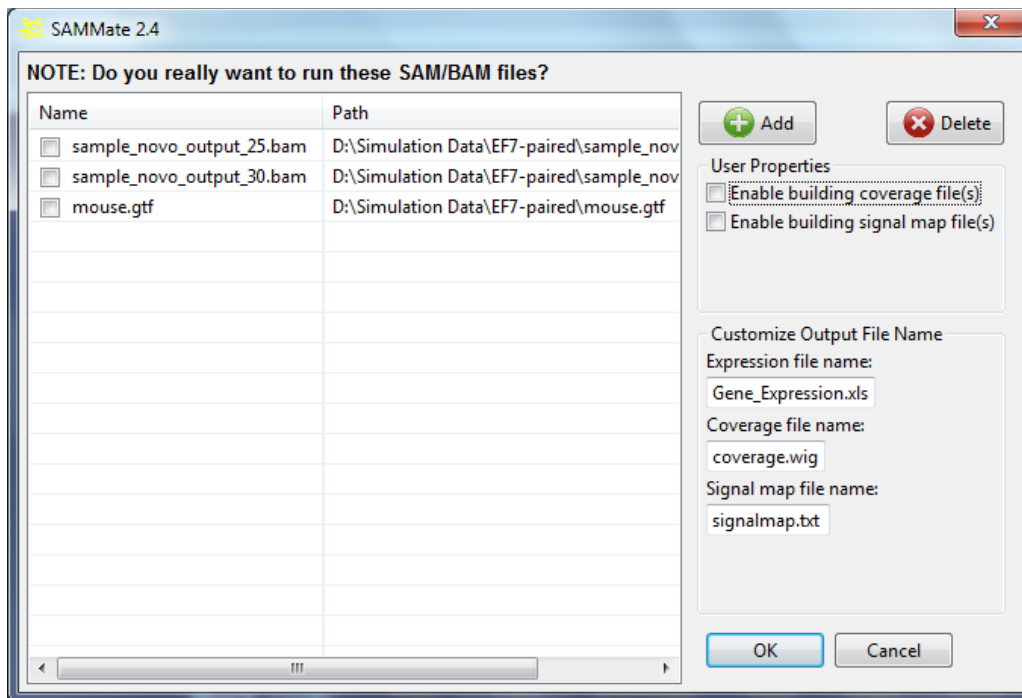

Figure 4.4.1-1 Annotation file and RNA-seq data processing dialogue

- In the popup dialogue, you can customize the output file names.
- Press the OK button to process the selected files.
- After the process is finished, a report file in HTML format is generated in the temporary folder.

**SAMMate 2.4 Result Report:**

|                            |                           |
|----------------------------|---------------------------|
| Name                       | sample_novo_output_20.sam |
| Reads Number On Exon       | 15036859 (74.74745%)      |
| Reads Number On Intron     | 2428034 (12.069633%)      |
| Reads Number On Junction   | 0 (0.0%)                  |
| Reads Number On Intergenic | 2651990 (13.182907%)      |
| Total Reads Number         | 20116883                  |

Figure 4.4.1-2 Alignment report file
